# Supplementary material for: Somatostatin receptor saturation after administration of high peptide amounts of [177Lu]Lu-HA-DOTATATE: when enough is enough
Source: Springer Nature journal article supplement (doi:10.1186/s13550-022-00946-3), 2022-12-14
Supplement: MOESM1 [file 23826460]

## **Supplementary Information**

### **Somatostatin Receptor Saturation after Administration of High Peptide Amounts of [<sup>177</sup>Lu]Lu-HA-DOTATATE – when enough is enough**

H. Siebinga<sup>1,2</sup>, C.H.A.M. Veerman<sup>2</sup>, B.J. de Wit – van der Veen<sup>2</sup>, M.P.M. Stokkel<sup>2</sup>, J.J.M.A. Hendriks<sup>1,2</sup>,  
E.A. Aalbersberg<sup>2</sup>

1 Department of Pharmacy & Pharmacology, The Netherlands Cancer Institute, Amsterdam, The Netherlands.

2 Department of Nuclear Medicine, The Netherlands Cancer Institute, Amsterdam, The Netherlands.

**Corresponding author:** e.aalbersberg@nki.nl, Plesmanlaan 121, 1066 CX Amsterdam, The Netherlands

**Supplemental Figure 1** – Trends in [<sup>177</sup>Lu]Lu-HA-DOTATATE organ and tumor uptake over cycles per patient, where red dots represent cycles with a high administered peptide amount.

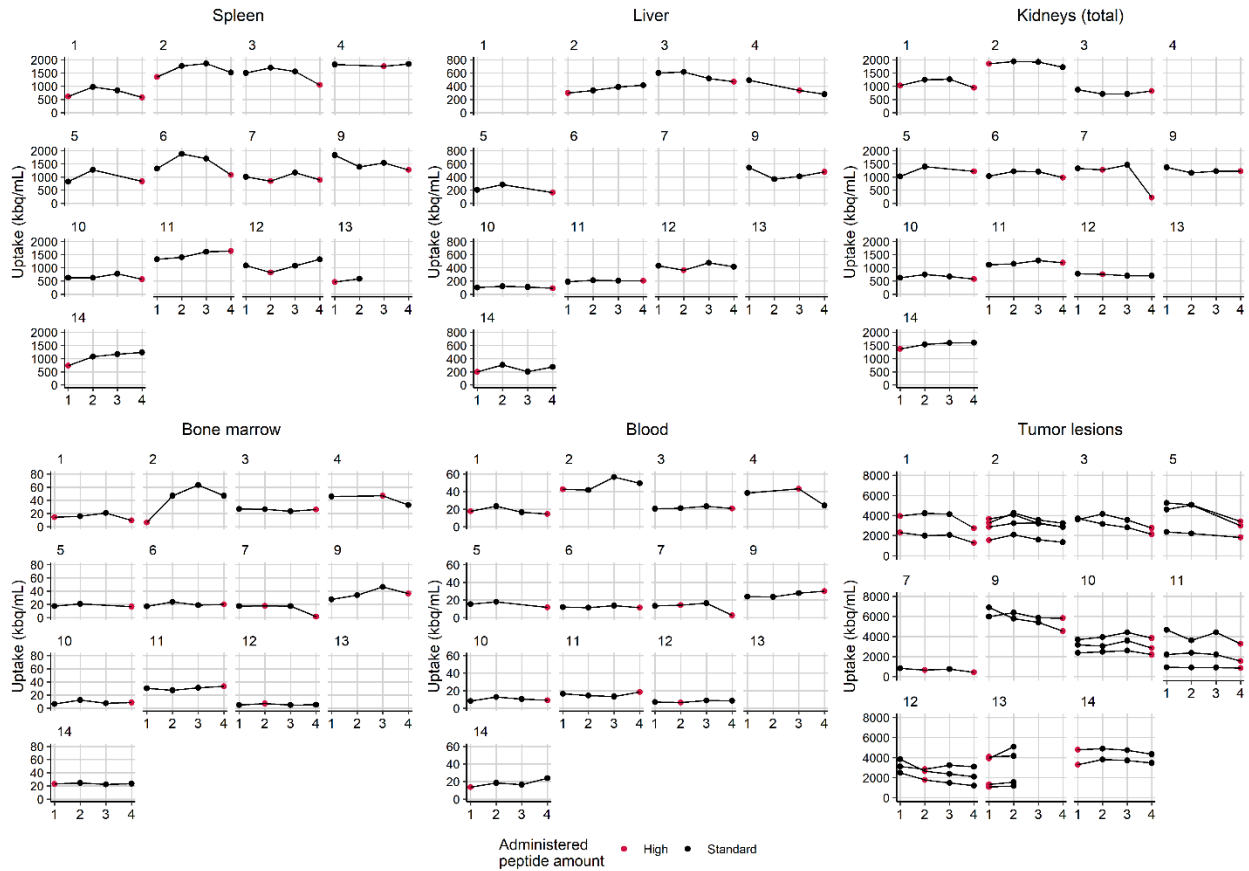

**Supplemental Figure 2** Trends in [ $^{177}\text{Lu}$ ]Lu-HA-DOTATATE organ and tumor uptake over cycles per patient, where yellow dots represent cycles with a low administered peptide amount.

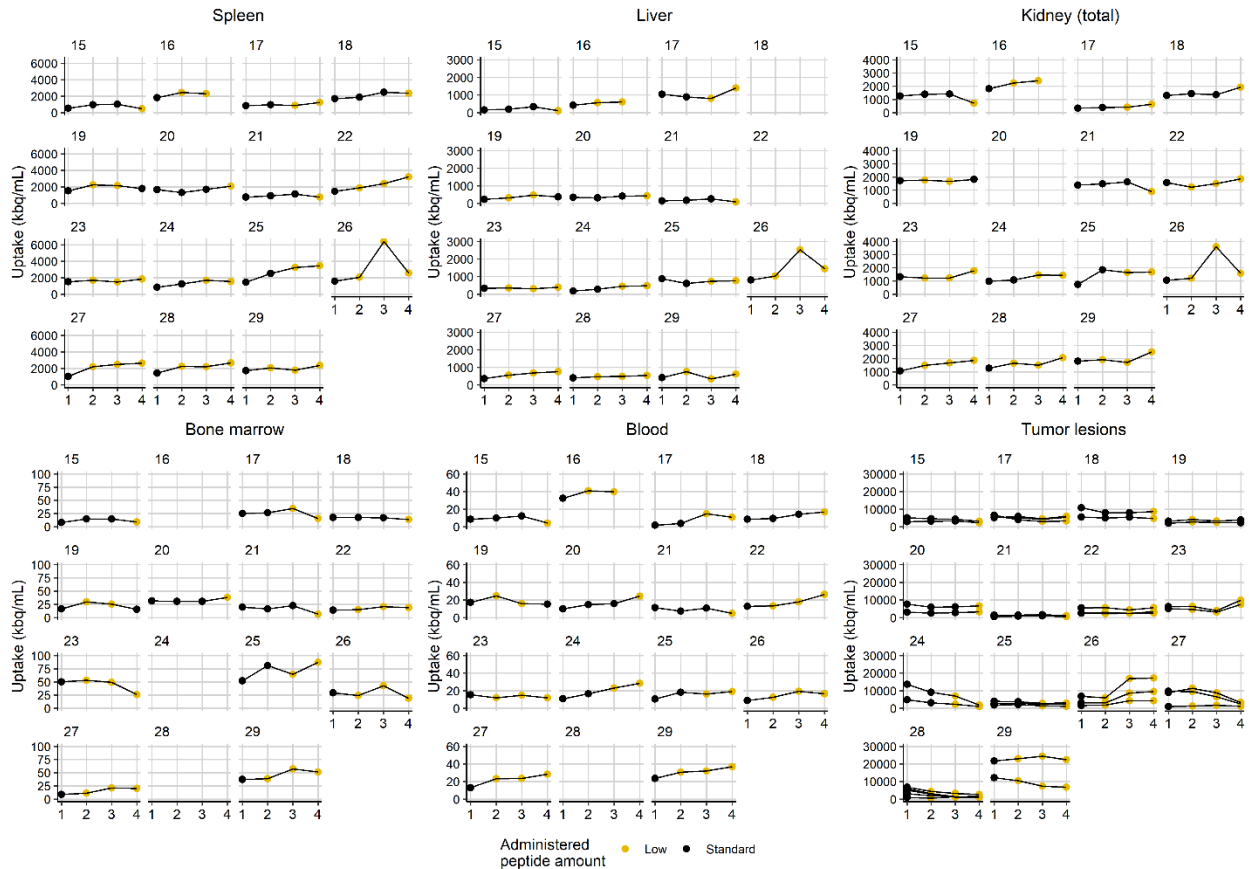

*Missing data due to diffuse liver metastases (n=2), diffuse bone metastases or spill-out by nearby tumor into the bone marrow (n=3), spill-out into the aorta by nearby tumor lesion (n=1), or no average being available due to a solitary kidney (n=1).*
